# Supplementary material for: Enhancing H2O2and glucose double detection by surface microstructure regulation of Brussels sprout-like Ni–Co(OH)2/rGO/carbon cloth composites
Source: Royal Society of Chemistry journal article supplement (doi:10.1039/d2tc00406b), 2022-01-01
Supplement: d2tc00406b2.pdf [file d2tc00406b2.pdf]

## Supporting Information

### Enhancing H<sub>2</sub>O<sub>2</sub> and Glucose Double Detection by Surface Microstructure Regulation of Brussels Sprouts-Like Ni- Co(OH)<sub>2</sub>/rGO/Carbon Cloth Composite

Xinmeng Zhang,<sup>\*a</sup> Zixuan Mao,<sup>a</sup> Wanyin Ge,<sup>a</sup> Jiajing Zhu,<sup>a</sup> Yuanxiao Zhao<sup>b</sup>

<sup>a</sup>School of Materials Science and Engineering, Shaanxi Key Laboratory of Green Preparation and Functionalization for Inorganic Materials, Shaanxi University of Science & Technology, Xi'an, 710021, China

<sup>b</sup>State Key Laboratory of Solidification Processing, Carbon/Carbon Composites Research Center, Northwestern Polytechnical University, Xi'an, 710072, China

#### Author Information

**\*Corresponding Author:** Xinmeng Zhang,

E-mail Address: zhangxinmeng12@126.com

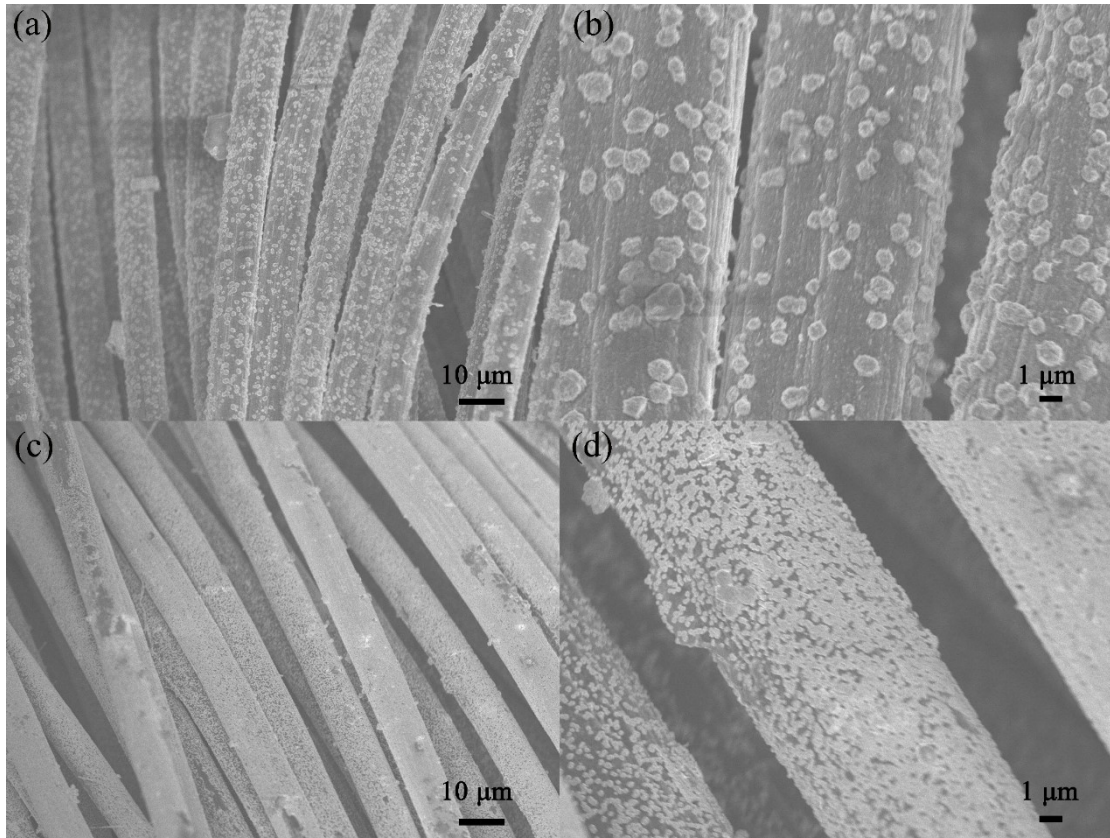

**Fig. S1** (a, b) SEM images of the Co(OH)<sub>2</sub>/CC and (c, d) Ni/CC composites.

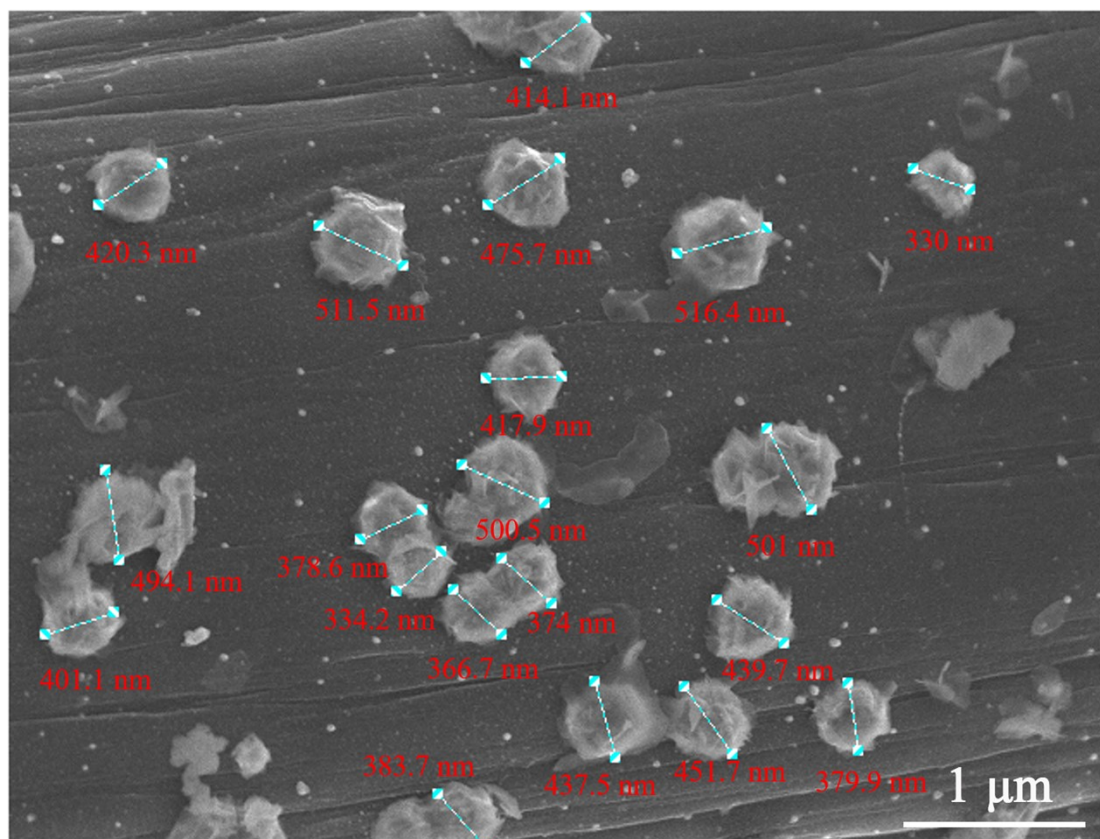

**Fig. S2** SEM image of the Ni-Co(OH)<sub>2</sub>/rGO/CC composite and the measurement results of diameters of Ni-Co(OH)<sub>2</sub> microparticles.

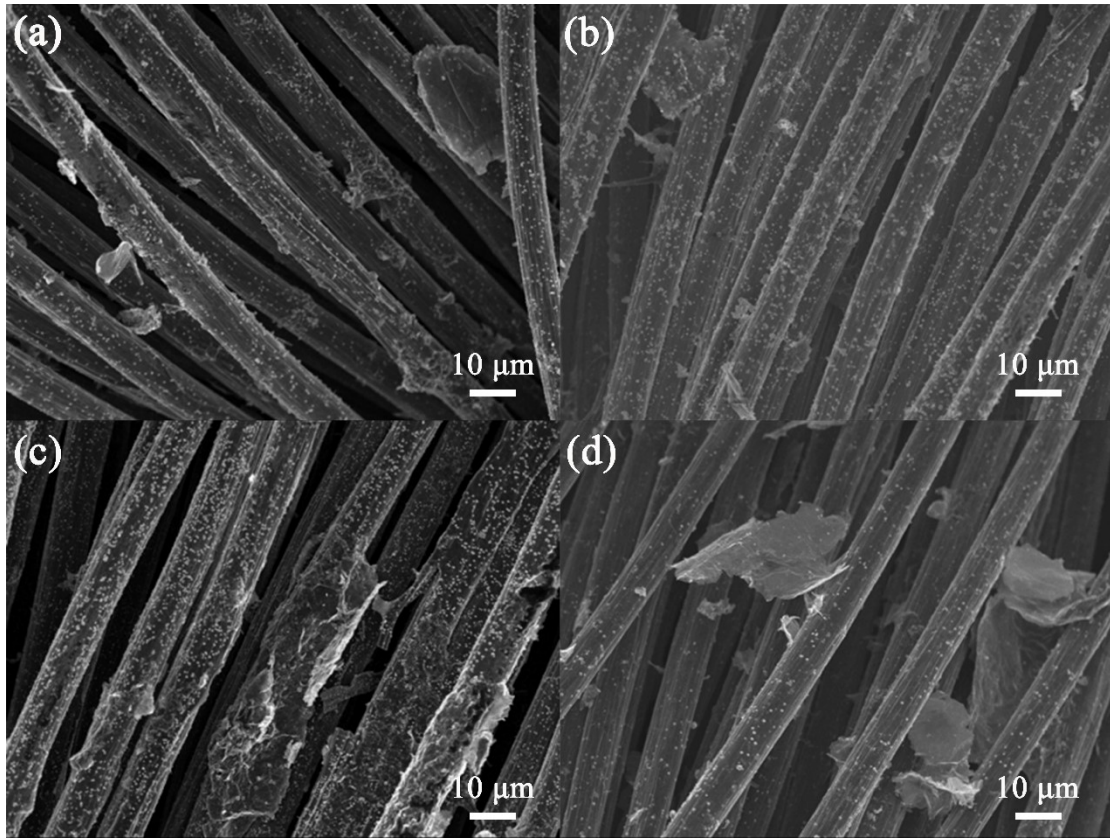

**Fig. S3** SEM images of (a) Ni-Co(OH)<sub>2</sub>/rGO1/CC, (b) Ni-Co(OH)<sub>2</sub>/rGO2/CC, (c) Ni-Co(OH)<sub>2</sub>/rGO3/CC, and (d) Ni-Co(OH)<sub>2</sub>/rGO4/CC composites.

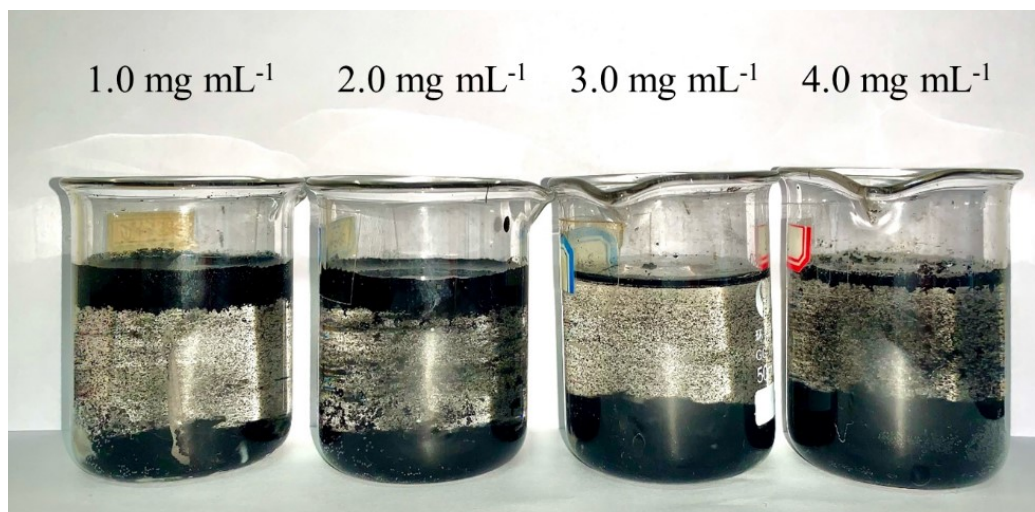

**Fig. S4** Digital photograph of Ni-Co(OH)<sub>2</sub>/rGO/CC composites in aqueous solution with different content of rGO after the hydrothermal reaction.

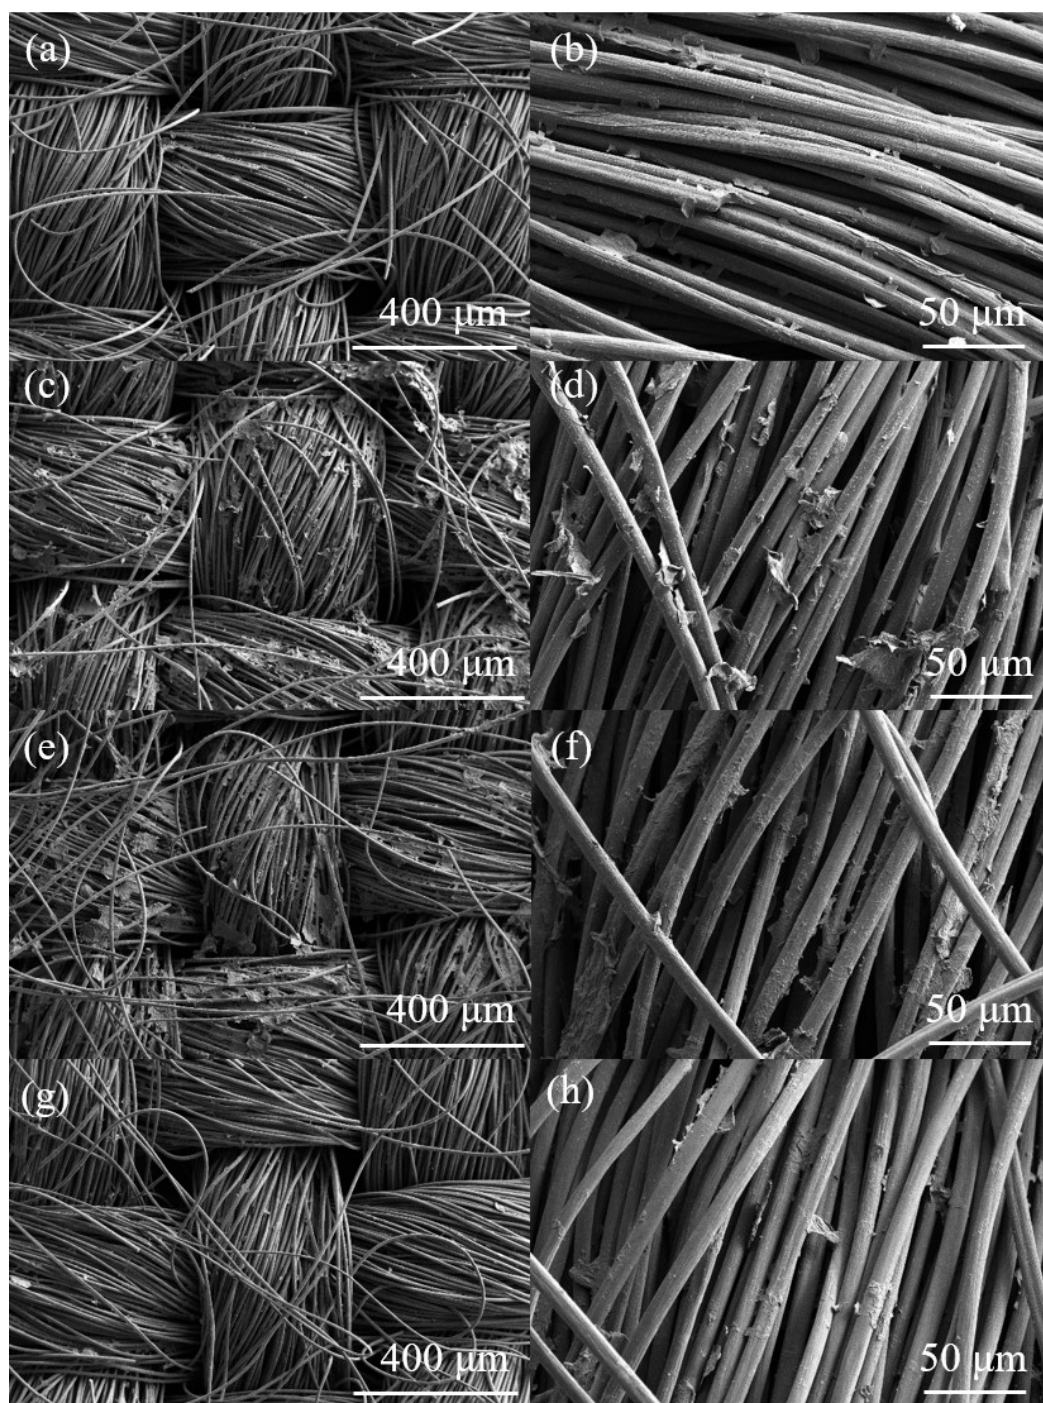

**Fig. S5** The FE-SEM images of rGO/CC composites with (a, b) 1.0, (c, d) 2.0, (e, f) 3.0, and (g, h)

4.0 mg mL<sup>-1</sup> content of rGO with different magnification.

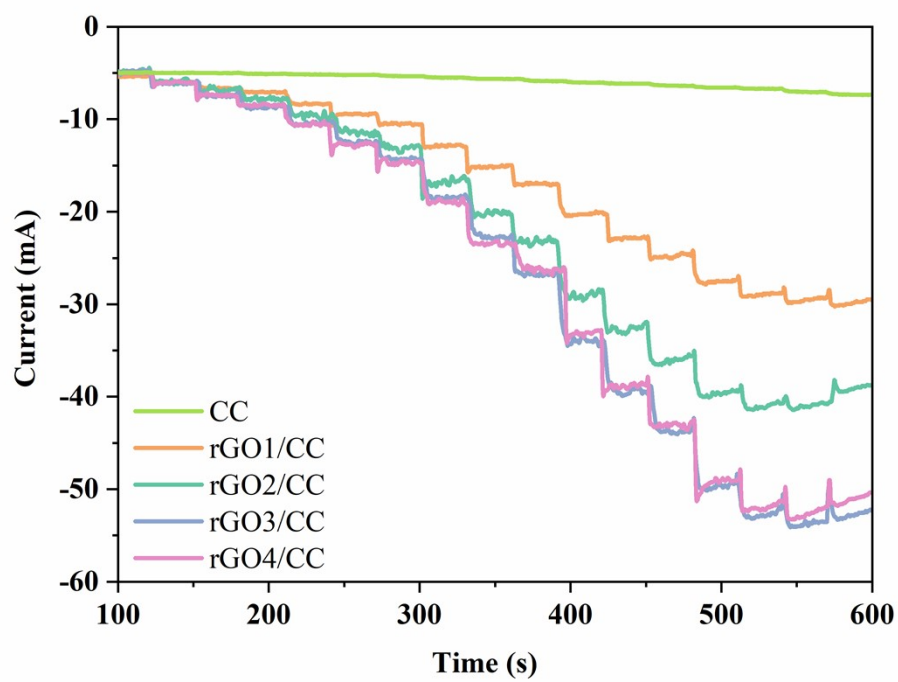

**Fig. S6** I-t curves of the rGO/CC electrodes were prepared by different content of rGO (1.0, 2.0, 3.0, and 4.0 mg mL<sup>-1</sup>) with the successive addition of different concentrations of H<sub>2</sub>O<sub>2</sub> at -0.57 V.

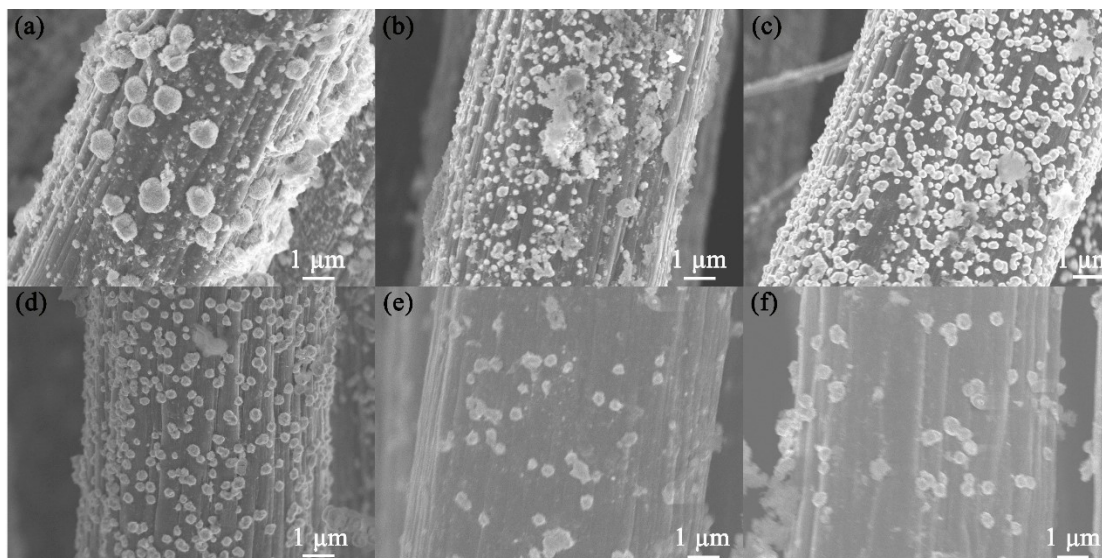

**Fig. S7** The SEM images of Ni-Co(OH)<sub>2</sub>/rGO3/CC composites with hydrothermal reaction time: (a) 3 h, (b) 6 h, (c) 9 h, (d) 12 h, (e) 18 h, and (f) 24 h (The other experimental conditions remain unchanged).



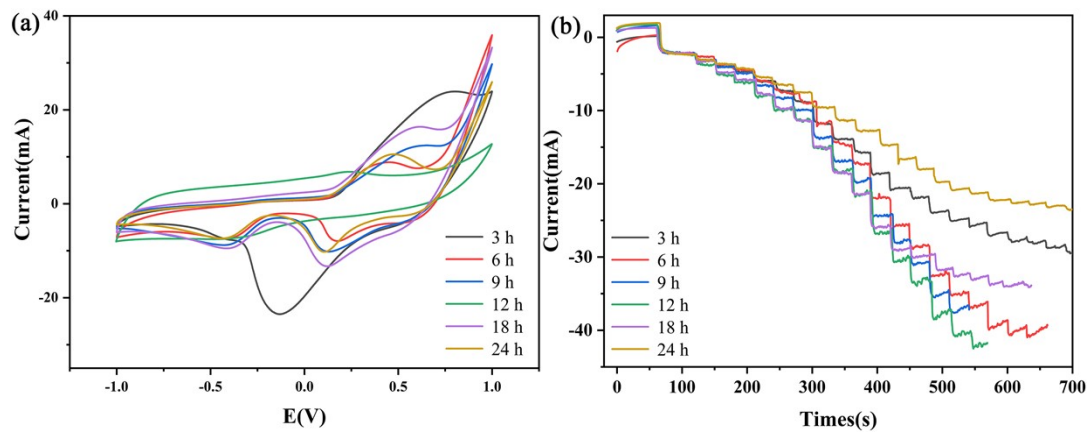

**Fig. S8** (a) The CVs of Ni-Co(OH)<sub>2</sub>/rGO<sub>3</sub>/CC electrodes with different hydrothermal reaction times at the scan rate of 50 mV·s<sup>-1</sup>. (b) I-t curves of the Ni-Co(OH)<sub>2</sub>/rGO<sub>3</sub>/CC electrodes were prepared with different hydrothermal reaction times by the successive addition of different concentrations of H<sub>2</sub>O<sub>2</sub> at -0.57 V.

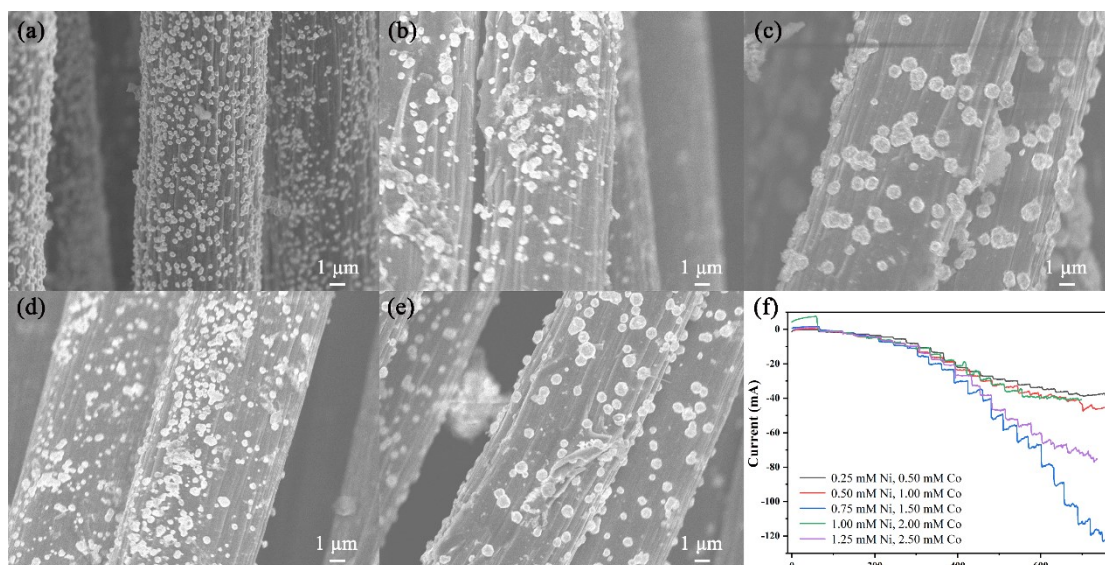

**Fig. S9** The SEM images of the content with (a) Ni is 0.25 mM, and Co is 0.50 mM; (b) Ni is 0.50 mM, and Co is 1.00 mM; (c) Ni is 0.75 mM, and Co is 1.50 mM; (d) Ni is 1.00 mM, and Co is 2.00 mM; (e) Ni is 1.25 mM, and Co is 2.50 mM. (f) I-t curves of the Ni-Co(OH)<sub>2</sub>/rGO<sub>3</sub>/CC electrodes with different concentrations of Ni and Co with the successive addition of different concentrations of H<sub>2</sub>O<sub>2</sub> at -0.57 V (The other experimental conditions remain unchanged).

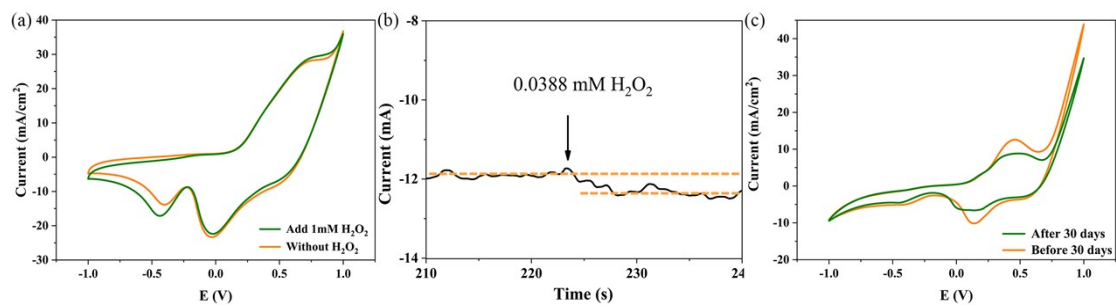

**Fig. S10** (a) The CVs of Ni-Co(OH)<sub>2</sub>/rGO3/CC electrodes in the presence and absence of 1 mM H<sub>2</sub>O<sub>2</sub> at -0.57 V. (b) The lowest concentration can be detected of Ni-Co(OH)<sub>2</sub>/rGO3/CC electrode in the experiment. (c) The CVs of Ni-Co(OH)<sub>2</sub>/rGO3/CC electrode before and after 30 days of storage at room temperature.

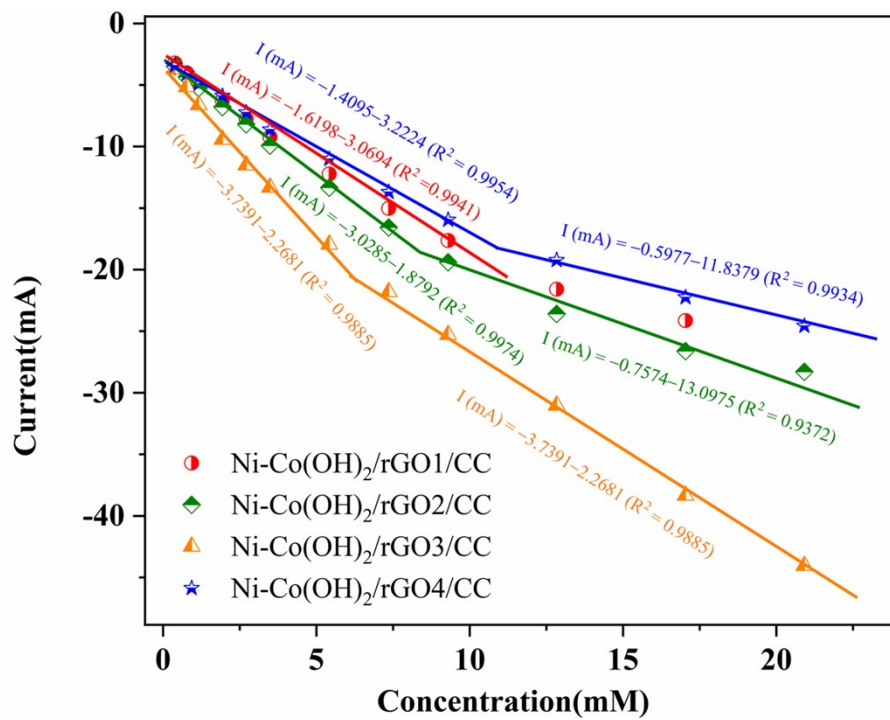

**Fig. S11** The corresponding calibration curves and calibration equations of Ni-Co(OH)<sub>2</sub>/rGO1/CC,

Ni-Co(OH)<sub>2</sub>/rGO2/CC, Ni-Co(OH)<sub>2</sub>/rGO3/CC, and Ni-Co(OH)<sub>2</sub>/rGO4/CC composites.

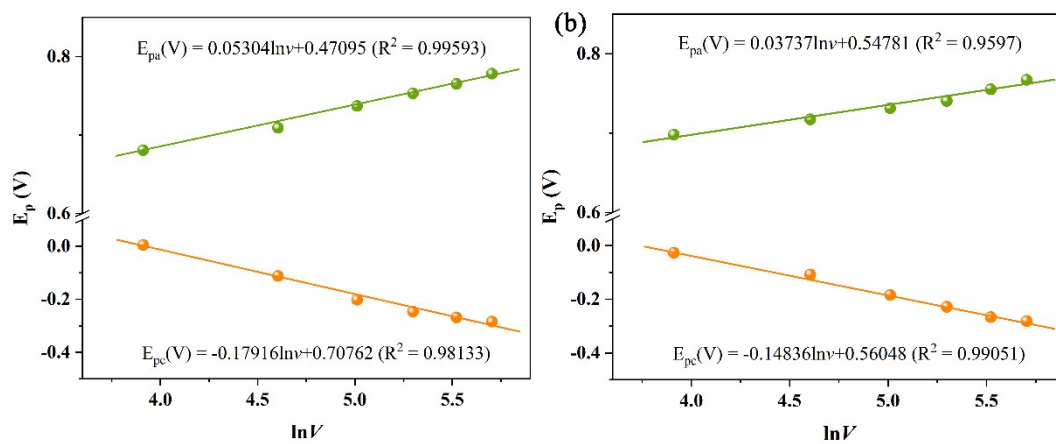

**Fig. S12** The variation trends of the peak potential versus the natural logarithm of scan rate for detection (a)  $H_2O_2$  and (b) glucose.

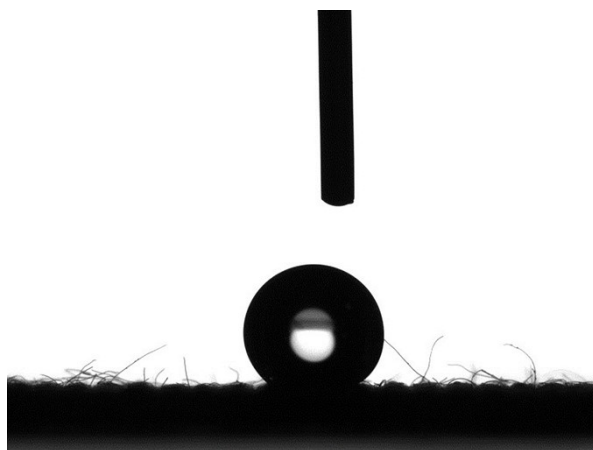

**Fig. S13** The distribution of 5  $\mu\text{L}$  water droplet on CC without hydrothermal reaction and the surface water contact angle is  $143.0^\circ$ .

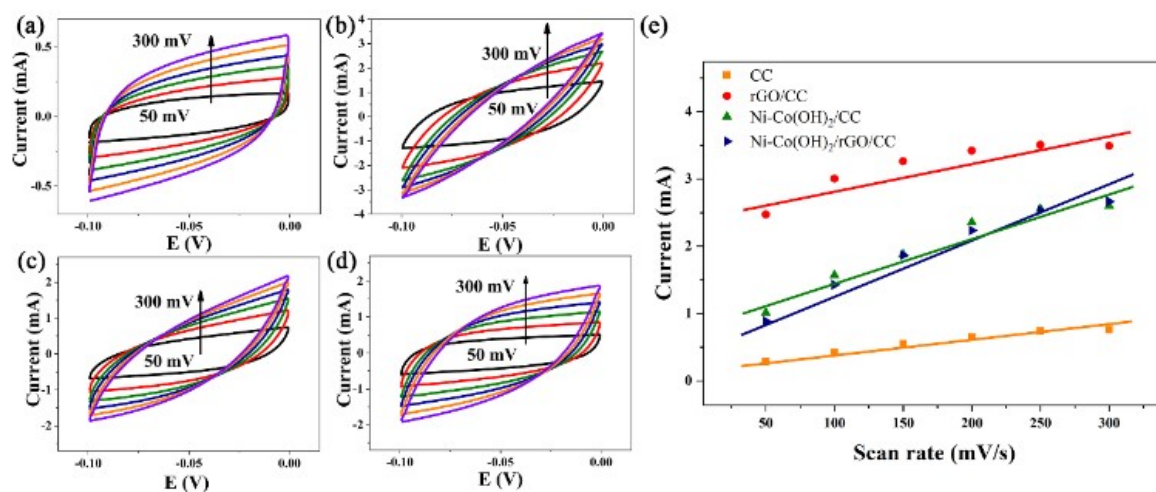

**Fig. S14** The CVs of (a) CC, (b) rGO/CC, (c) Ni-Co(OH)<sub>2</sub>/CC, and (d) Ni-Co(OH)<sub>2</sub>/rGO/CC electrodes were performed from  $-0.1$  to  $0$  V with different scan rates. (e) Current versus scan rates based on the CVs curves of (a-d) at a voltage of  $-0.05$  V.

**Table S1** EIS relevant data of Ni-Co(OH)<sub>2</sub>/rGO/CC electrodes with different content of rGO.

| Samples                         | R <sub>s</sub> (Ω) | R <sub>ct</sub> (Ω) | W <sub>o</sub> -R (Ω) |
|---------------------------------|--------------------|---------------------|-----------------------|
| Ni-Co(OH) <sub>2</sub> /CC      | 32.69              | 34.33               | 31.66                 |
| Ni-Co(OH) <sub>2</sub> /rGO1/CC | 25.14              | 19.42               | 14.36                 |
| Ni-Co(OH) <sub>2</sub> /rGO2/CC | 22.25              | 17.23               | 7.00                  |
| Ni-Co(OH) <sub>2</sub> /rGO3/CC | 22.65              | 17.22               | 13.66                 |
| Ni-Co(OH) <sub>2</sub> /rGO4/CC | 24.90              | 20.53               | 13.06                 |



**Table S2** Sensing performance of H<sub>2</sub>O<sub>2</sub> sensor in a recently reported.

| The test materials                              | Detection limit<br>( $\mu\text{M}$ ) | Sensitivity<br>( $\text{mA cm}^{-2} \text{mM}^{-1}$ ) | References |
|-------------------------------------------------|--------------------------------------|-------------------------------------------------------|------------|
| AuPt/MOF-Graphene                               | 0.019                                | 0.006                                                 | [35]       |
| Ag/M-ZIF                                        | 1.100                                | 0.420                                                 | [36]       |
| Ag/Fe                                           | 0.100                                | 1.350                                                 | [37]       |
| NiCo <sub>2</sub> N/NG                          | 0.050                                | 0.002                                                 | [38]       |
| Au/MnO                                          | 0.080                                | 0.208                                                 | [39]       |
| NiCo <sub>2</sub> O <sub>4</sub> RMNs@PEDOT/rGO | 0.031                                | 0.679                                                 | [40]       |
| AuNPs-N-GQDs                                    | 0.120                                | 0.186                                                 | [41]       |
| Ni-Co(OH) <sub>2</sub> /rGO3/CC                 | 0.002                                | 3.739                                                 | This work  |

**Table S3** Sensing performance of glucose sensor in a recently reported.

| The test materials                   | Detection limit<br>( $\mu\text{M}$ ) | Sensitivity<br>( $\text{mA cm}^{-2} \text{mM}^{-1}$ ) | References |
|--------------------------------------|--------------------------------------|-------------------------------------------------------|------------|
| graphene@ZIF                         | 0.360                                | 1.521                                                 | [43]       |
| NiO nanostructures                   | 0.500                                | 0.004                                                 | [44]       |
| NCAG/Fe                              | 0.530                                | 2.455                                                 | [45]       |
| NBC/GCE                              | 0.041                                | 0.416                                                 | [46]       |
| NiS                                  | 0.052                                | 0.006                                                 | [47]       |
| NiCo LDH/GCE                         | 0.011                                | 0.166                                                 | [12]       |
| 3D graphene/ $\text{Co}_3\text{O}_4$ | 0.025                                | 3.390                                                 | [48]       |
| Ni-Co(OH) <sub>2</sub> /rGO3/CC      | 0.115                                | 1.846                                                 | This work  |

**Table S4**  $C_{dl}$  and ECSA values of different electrodes in 0.1 M KOH.

| Electrodes                     | $C_{dl}$ (mF) | ECSA (cm <sup>2</sup> ) |
|--------------------------------|---------------|-------------------------|
| CC                             | 1.960         | 110.274                 |
| rGO/CC                         | 4.378         | 246.249                 |
| Ni-Co(OH) <sub>2</sub> /CC     | 6.508         | 366.068                 |
| Ni-Co(OH) <sub>2</sub> /rGO/CC | 7.189         | 404.372                 |
